# Supplementary material
Source: HighWire-hosted journal article supplement (https://bmjopen.bmj.com/content/15/3/e082736)
Supplement: inline-supplementary-material-1 [file inline-supplementary-material-1.pdf]

## Supplementary file 1. References of the 34 papers by literature review

**References****31 domestic and foreign literature on the competency of general practitioners**

- [1] PAN Xiao-yan. Evaluation index system of general practitioner quality in Guangxi [in Chinese]. Hunan:Central South University,2013.
- [2] JIN Li-jiao, JIA Ying-lei, SUN Tao, et al. Competency Model of General Practitioners: An Exploratory Factor Analysis [in Chinese]. Chinese General Practice. 2013,16(11):3659-3661.
- [3] DONG Hai-na, ZHU Shun, WANG Wei-jie. Application of Fuzzy Comprehensive Evaluation Method in the Evaluation of Core Competence of General Practitioners [in Chinese]. China Health Statistics,2014,31(2):273-274,277.
- [4] YE Teng-fei, PAN Xiao-yan. Construction of Evaluating Index System Based on the AHP on the Competence of Urban General Practitioner in Guangxi [in Chinese]. Chinese General Practice. 2014,17(7):752-755.
- [5] ZHU Shun, DONG Hai-na, WANG Wei-jie. Construction of Core Competency Evaluation Index System for General Practitioner [in Chinese]. Chinese General Practice.2014,17(4):378-380.
- [6] WANG jing. Establishing and Empirical Study on Post Competency Model for General Practitioner. Shanxi: Shanxi Medical University,2016
- [7] WANG Fang. Evaluation index system of general practitioner quality. Shandong:Qingdao University,2017.
- [8] HAN Ying, WANG Jing, ZHENG Jian-zhong, et al. Construction of Evaluation Index System of Post Competency of General Practitioners [in Chinese]. Chinese General Practice. 2017,20(1):15-20.
- [9] HUANG FU Hui-hui, LI Hong-yan. Evaluation Model and Empirical Study of Family Doctor Competency in Shanghai Based on Meta-competence [in Chinese]. Modern Hospital Management,2018,16(3):4-8.
- [10] WANG Meei-rong, GE Cai-ying, ZHANG Dan-dan, et al. Evaluation Index System Construction of Consultation Competence of Training of General Practitioners [in Chinese]. Medicine and Society,2018,31(4):70-73.

- [11] YIN Zhu-ping, LIANG Hong-min, PENG Yun-zhu, et al. Developing a general practitioners' professional capacities model in the ethnic minority region of Yunnan Province [in Chinese]. *China Higher Medical Education*, 2018,(9):9-10,30.
- [12] LI Mi-qiong, WU Yu-miao, ZHU Jie, et al. Development of a Family Doctor Performance Evaluation System Using the Delphi Method [in Chinese]. *Chinese General Practice*, 2019,22(16):1989-1995.
- [13] LU Zhi-min, LU Ping. Exploratory Analysis of Competency Indicators for General Practitioners [in Chinese]. *Chinese General Practice*, 2019,22(28):3495-3500.
- [14] LU Ping, LU Zhi-min, QIAN Zhi-fang. Construction of Family Doctor's Competency Indicator System Based on the Delphi Method [in Chinese]. *Chinese General Practice*, 2020,23(28):3553-3560.
- [15] FANG Jin-ming, TAO Hong-bin, PENG Yi-xiang, et al. Construction of Post Competency Model for General Practitioners [in Chinese]. *Medicine and Society*, 2020,33(1):129-133.
- [16] YANG Shifang, JI Lupeng, LI Xiaoming, et al. The Impact of MDT-based CBL Education Mode on Improving Clinical Practice Skills of General Practitioners [in Chinese]. *Chinese General Practice*, 2024.
- [17] NI Lihua, LIU Yi, WU Xiaoyan. SWOT Analysis of the Combined Teaching Mode in General Medicine Teaching. *China Continuing Medical Education*, 2024,16(10):143-148.
- [18] Patterson F, Ferguson E, Lane P, et al. A competency model for general practice: implications for selection, training, and development. *British Journal of General Practice*. 2000,50(452):188-93.
- [19] van de Camp K, Vernooij-Dassen M, Grol R, et al. Professionalism in general practice\_ development of an instrument to assess professional behavior in general practitioner trainees. *Medical Education*. 2006,40(1):43-50.
- [20] Allen T, Brailovsky C, Rainsberry P, et al. Defining competency-based evaluation objectives in family medicine\_ dimensions of competence and priority topics for assessment *Canadian Family Physician*. 2011,57(9):e331-40.
- [21] Galbraith K, Ward A, Heneghan C. A real-world approach to Evidence-Based Medicine in general practice: a competency framework derived from a systematic review and Delphi process. *BMC Med Educ*. 2017 May 3;17(1):78.

- [22] Mitsuyama T, Son D, Eto M. Competencies required for general practitioners/family physicians in urban areas versus non-urban areas\_ a preliminary study. *BMC Family Practice*. 2018;29;19(1):186. DOI: 10.1186/s12875-018-0869-4.
- [23] Covert H, Sherman M, Miner K, et al. Core Competencies and a Workforce Framework for Community Health Workers: A Model for Advancing the Profession. *The American Journal of Public Health*. 2019;109(2):320-327.
- [24] Fielding A, Mulquiney K, Canalese R, et al. A general practice workplace-based assessment instrument: Content and construct validity. *Med Teach*. 2020 Feb;42(2):204-212.
- [25] Wei Y, Wang F, Pan Z, et al. Development of a competency model for general practitioners after standardized residency training in China by a modified Delphi method. *BMC Fam Pract*. 2021 Aug 26;22(1):171.
- [26] Valentini J, Klocke C, Güthlin C, et al. Integration of complementary and integrative medicine competencies in general practice postgraduate education - development of a novel competency catalogue in Germany. *BMC Complement Med Ther*. 2021 Oct 6;21(1):250.
- [27] The Accreditation Council for Graduate Medical Education and The American Board of Family Medicine. The Family Medicine Milestone Project. 2015.  
<http://www.acgme.org/Portals/0/PDFs/Milestones/FamilyMedicineMilestones.pdf>. Accessed February 17, 2021(accessed May 28, 2023)
- [28] The Royal College of General practitioners. Workplace Based Assessment (WPBA) competencies. 2016. <https://www.rcgp.org.uk/training-exams/mrcgp-exam-overview.aspx>. (accessed May 28, 2023)
- [29] The College of Family Physicians of Canada. CanMEDS-FM 2017: A competency framework for family physicians across the continuum. 2017. <https://www.cfpc.ca/canmedsfm/>. (accessed May 28, 2023)
- [30] The Royal Australian College of General Practitioners. Competency profile of the Australian general practitioner at the point of fellowship. 2015.  
<https://www.racgp.org.au/FSDEDEV/media/documents/Education/Registrars/Fellowship%20Pathways/FRACGP/Competency-profile.pdf>. (accessed May 28, 2023)
- [31] Wonca Europe. The European definition of general practice/family medicine [EB/OL].2011. .  
<https://www.woncaeurope.org/file/0dce3f9f-e60f-4416-b257-4698590bd0c9/WONCA>

[European Definitions 2 v7%20\(1\).pdf](#). (accessed May 28, 2023)

### **3 policy documents on the construction and responsibilities of general practice**

[32] State Council, Central Committee of the Communist Party of China. Guiding opinions of the General Office of the State Council on promoting the construction of hierarchical diagnosis and treatment system [in Chinese]. 2015.

[http://www.gov.cn/zhengce/content/2015-09/11/content\\_10158.htm](http://www.gov.cn/zhengce/content/2015-09/11/content_10158.htm) (accessed May 28, 2023)

[33] Department of Science and Technology Education. Guideline for the Establishment of General Practice in Standardized Training Base for Resident Doctors (General Hospital) (Trial) [in Chinese]. 2018.

<http://www.nhc.gov.cn/qjjys/s3593/201809/951a65647c41459b858ccf1c26fc1acb.shtml>

(accessed May 28, 2023)

[34] State Council. Guidance of the state council on establishing the general practitioner system [in Chinese]. 2011. [http://www.gov.cn/zwgk/2011-07/07/content\\_1901099.htm](http://www.gov.cn/zwgk/2011-07/07/content_1901099.htm). Accessed February 17, 2021
