# Supplementary material
Source: HighWire-hosted journal article supplement (https://bmjopen.bmj.com/content/15/3/e082736)
Supplement: inline-supplementary-material-3 [file inline-supplementary-material-3.pdf]

| Supplementary material 3. Results of the Delphi process |                                                                            |            |                 |             |                 |            |                 |             |                 |
|---------------------------------------------------------|----------------------------------------------------------------------------|------------|-----------------|-------------|-----------------|------------|-----------------|-------------|-----------------|
| Primary indicator                                       | Secondary and tertiary indicators                                          | Round 1    |                 |             |                 | Round 2    |                 |             |                 |
|                                                         |                                                                            | Importance |                 | Feasibility |                 | Importance |                 | Feasibility |                 |
|                                                         |                                                                            | Median     | Agreement (7-9) | Median      | Agreement (7-9) | Median     | Agreement (7-9) | Median      | Agreement (7-9) |
| 1. Medical services                                     | <b>1.1 Clinical knowledge and skills</b>                                   |            |                 |             |                 |            |                 |             |                 |
|                                                         | ▲ 1.1.1 Possess comprehensive expertise in clinical medicine               | -          | -               | -           | -               | 9          | 100%            | 9           | 100%            |
|                                                         | ▲ 1.1.2 Possess comprehensive expertise in general practice                | -          | -               | -           | -               | 9          | 100%            | 9           | 100%            |
|                                                         | 1.1.3 History taking                                                       | 9          | 100%            | 9           | 100%            | 9          | 100%            | 9           | 100%            |
|                                                         | 1.1.4 Physical examination                                                 | 9          | 94.7%           | 9           | 100%            | 9          | 100%            | 9           | 100%            |
|                                                         | 1.1.5 Clinical test                                                        | 9          | 100%            | 9           | 100%            | 9          | 100%            | 9           | 100%            |
|                                                         | 1.1.6 Basic clinical operation skill                                       | 9          | 100%            | 9           | 100%            | 9          | 100%            | 9           | 100%            |
|                                                         | 1.1.7 Diagnosis and differential diagnosis                                 | 9          | 100%            | 9           | 100%            | 9          | 100%            | 9           | 100%            |
|                                                         | 1.1.8 Medical record writing                                               | 9          | 100%            | 9           | 100%            | 9          | 100%            | 9           | 100%            |
|                                                         | <b>1.2 Diagnosis and treatment</b>                                         |            |                 |             |                 |            |                 |             |                 |
|                                                         | 1.2.1 Manage diseases at early stage presenting in an undifferentiated way | 9          | 100%            | 9           | 100%            | 9          | 100%            | 9           | 100%            |
|                                                         | 1.2.2 Treat outpatient and inpatient                                       | 9          | 100%            | 9           | 100%            | 9          | 100%            | 9           | 100%            |
|                                                         | 1.2.3 Manage emergency conditions                                          | 9          | 100%            | 9           | 94.7%           | 9          | 100%            | 9           | 94.7%           |
|                                                         | 1.2.4 Safe and rational use of medicines                                   | 9          | 100%            | 9           | 94.7%           | 9          | 100%            | 9           | 94.7%           |
|                                                         | 1.2.5 Arrange referrals to specialists or primary care when necessary      | 9          | 100%            | 9           | 94.7%           | 9          | 100%            | 9           | 100%            |
|                                                         | <b>1.3 Chronic disease management</b>                                      |            |                 |             |                 |            |                 |             |                 |
|                                                         | 1.3.1 Help patients set chronic disease management goals                   | 9          | 100%            | 9           | 94.7%           | 9          | 100%            | 9           | 94.7%           |
|                                                         | 1.3.2 Health education                                                     | 9          | 100%            | 9           | 100%            | 9          | 100%            | 9           | 100%            |
|                                                         | 1.3.3 Medication guidance                                                  | 9          | 100%            | 9           | 94.7%           | 9          | 100%            | 9           | 94.7%           |
|                                                         | 1.3.4 Regular follow-up                                                    | 9          | 100%            | 9           | 100%            | 9          | 100%            | 9           | 100%            |

|             |                                                                                                                 |   |       |   |       |   |      |   |       |
|-------------|-----------------------------------------------------------------------------------------------------------------|---|-------|---|-------|---|------|---|-------|
| 2. Teaching | 1.3.5 Help patients improve chronic disease management strategies                                               | 9 | 100%  | 9 | 100%  | 9 | 100% | 9 | 100%  |
|             | ▲1.3.6 Direct community-based chronic disease management                                                        | - | -     | - | -     | 9 | 100% | 9 | 94.7% |
|             | 1.4 Communication                                                                                               |   |       |   |       |   |      |   |       |
|             | 1.4.1 Listen carefully to patients and be empathic                                                              | 9 | 100%  | 9 | 94.7% | 9 | 100% | 9 | 94.7% |
|             | 1.4.2 Explain things clearly and check for patients and families understanding                                  | 9 | 100%  | 9 | 100%  | 9 | 100% | 9 | 100%  |
|             | 1.4.3 Discuss with patients and families about their health condition and thoughts                              | 9 | 100%  | 9 | 94.7% | 9 | 100% | 9 | 94.7% |
|             | 1.4.4 Propose treatment plan to patients and families                                                           | 9 | 100%  | 9 | 100%  | 9 | 100% | 9 | 100%  |
|             | 1.4.5 Engage patients and families in making decision of therapy plan that reflect their needs, value and goals | 9 | 100%  | 9 | 94.7% | 9 | 100% | 9 | 94.7% |
|             | ▲1.4.6 Communicate effectively with colleagues                                                                  | - | -     | - | -     | 9 | 100% | 9 | 100%  |
|             | ▲1.4.7 Communicate effectively with stuffs in primary care institutions                                         | - | -     | - | -     | 9 | 100% | 9 | 100%  |
|             | 2.1 Theoretical lectures                                                                                        |   |       |   |       |   |      |   |       |
|             | 2.1.1 Preparation and design for lectures                                                                       | 9 | 100%  | 9 | 100%  | 9 | 100% | 9 | 100%  |
|             | ▲2.1.2 know about teaching techniques                                                                           | - | -     | - | -     | 9 | 100% | 9 | 100%  |
|             | 2.1.3 Conduct theoretical lectures                                                                              | 9 | 94.7% | 9 | 100%  | 9 | 100% | 9 | 100%  |
|             | 2.2 Practical teaching                                                                                          |   |       |   |       |   |      |   |       |
|             | 2.2.1 Provide instruction to trainees in clinical skills                                                        | 9 | 100%  | 9 | 100%  | 9 | 100% | 9 | 100%  |
|             | 2.2.2 Provide instruction to trainees in medical records writing                                                | 9 | 100%  | 9 | 100%  | 9 | 100% | 9 | 100%  |
|             | 2.2.3Provide instruction to trainees in disease diagnosis and treatment                                         | 9 | 100%  | 9 | 100%  | 9 | 100% | 9 | 100%  |
|             | 2.2.4 Provide instruction to trainees in                                                                        | 9 | 94.7% | 9 | 100%  | 9 | 100% | 9 | 100%  |

|               |                                                            |   |       |   |       |   |       |   |       |
|---------------|------------------------------------------------------------|---|-------|---|-------|---|-------|---|-------|
| 3. Research   | case discussion                                            |   |       |   |       |   |       |   |       |
|               | 2.2.5 Conduct joint theoretical lectures with primary care | 9 | 94.7% | 9 | 100%  | 9 | 100%  | 9 | 100%  |
|               | 2.2.6 Conduct joint case discussion with primary care      | 9 | 100%  | 9 | 100%  | 9 | 100%  | 9 | 100%  |
|               | 2.2.7 Conduct joint teaching rounds with primary care      | 9 | 100%  | 9 | 100%  | 9 | 100%  | 9 | 100%  |
|               | 2.3 Self-directed learning                                 |   |       |   |       |   |       |   |       |
|               | 2.3.1 Practice-based learning and improvement              | 9 | 94.7% | 8 | 89.5% | 9 | 94.7% | 9 | 89.5% |
|               | 2.3.2 Continuing medical education                         | 9 | 89.5% | 9 | 89.5% | 9 | 94.7% | 9 | 94.7% |
|               | 2.3.3 Participate in academic activities actively          | 8 | 84.2% | 8 | 89.5% | 9 | 89.5% | 9 | 89.5% |
|               | 3.1 Project design and declaration                         |   |       |   |       |   |       |   |       |
|               | 3.1.1 Literature search                                    | 8 | 89.5% | 8 | 89.5% | 9 | 94.7% | 9 | 94.7% |
|               | 3.1.2 Literature reading                                   | 8 | 89.5% | 8 | 89.5% | 9 | 94.7% | 9 | 94.7% |
|               | 3.1.3 know about the principles of research                | 8 | 89.5% | 8 | 84.2% | 9 | 94.7% | 9 | 94.7% |
|               | 3.1.4 Write project application form                       | 8 | 84.2% | 7 | 78.9% | 9 | 94.7% | 9 | 89.5% |
|               | 3.2 Scientific research                                    |   |       |   |       |   |       |   |       |
|               | ▲3.2.1 Master investigation techniques                     | - | -     | - | -     | 8 | 94.7% | 8 | 94.7% |
|               | 3.2.2 Master scientific research methods                   | 8 | 89.5% | 7 | 84.2% | 8 | 94.7% | 8 | 94.7% |
|               | 3.2.3 Carry out scientific research                        | 8 | 73.7% | 8 | 73.7% | 9 | 89.5% | 8 | 89.5% |
|               | 3.3 Report of scientific research results                  |   |       |   |       |   |       |   |       |
|               | 3.3.1 Statistical analysis of data                         | 8 | 78.9% | 7 | 73.7% | 9 | 94.7% | 7 | 84.2% |
|               | 3.3.2 Write paper                                          | 8 | 84.2% | 8 | 89.5% | 9 | 94.7% | 9 | 84.2% |
|               | 3.3.3 Show about the scientific research achievements      | 7 | 73.7% | 8 | 94.7% | 9 | 94.7% | 8 | 89.5% |
| 4. Prevention | 4.1 Disease prevention                                     |   |       |   |       |   |       |   |       |
|               | 4.1.1 Know about the risk of disease                       | 9 | 100%  | 9 | 100%  | 9 | 100%  | 9 | 100%  |
|               | 4.1.2 Assess the risk of disease                           | 9 | 100%  | 9 | 94.7% | 9 | 100%  | 9 | 100%  |
|               | 4.1.3 Intervention on the risk of disease                  | 9 | 100%  | 9 | 100%  | 9 | 100%  | 9 | 100%  |

|                       |   |      |   |      |   |      |   |       |
|-----------------------|---|------|---|------|---|------|---|-------|
| 4.2 Screening         |   |      |   |      |   |      |   |       |
| 4.2.1 Early screening | 9 | 100% | 9 | 100% | 9 | 100% | 9 | 94.7% |
| 4.2.2 Early diagnosis | 9 | 100% | 9 | 100% | 9 | 100% | 9 | 94.7% |

Note: Indicators in the table are modified versions after two rounds of consultation; experts rated the importance and feasibility of each indicator on a 1–9 Likert scale (1 = not important/feasible and 9 = very important/feasible).

▲ items added in the second round
